# Supplementary material
Source: Hindawi journal article supplement (doi:10.1155/2012/185942)

## Supplementary material- tables and figures

### Abbreviations:

'*Candidatus* Phytoplasma species' were abbreviated as 'Ca. P. asteris' strain OY-M: OY-M; 'Ca. P. asteris' strain AY-WB: AY-WB; 'Ca. P. australiense': Paus and 'Ca. P. mali': Pmal. Locus tags (e.g. PAM\_) are provided in brackets.

### Supplementary Table 1 (ST1). Retron-related functions.

| Gene | Description                       | OY-M<br>(PAM_) | AYWB<br>(AYWB_) | Paus<br>(PAa_0) | Pmal<br>(ATP_00) |
|------|-----------------------------------|----------------|-----------------|-----------------|------------------|
|      | retron-type reverse transcriptase | 342            | -               | 471             | -                |

### Supplementary Table 2 (ST2). Genes involved in DNA replication.

| Gene             | Description                                   | OY-M<br>(PAM_)                                | AYWB<br>(AYWB_)                 | Paus<br>(PAa_0)          | Pmal<br>(ATP_00) |
|------------------|-----------------------------------------------|-----------------------------------------------|---------------------------------|--------------------------|------------------|
| <i>dnaA</i>      | ATPase involved in DNA replication initiation | 001                                           | 001                             | 0001                     | 193              |
| <i>dnaB1</i>     | Replicative DNA helicase                      | 013                                           | 007                             | 148                      | 176              |
| <i>dnaB2</i>     | Replicative DNA helicase                      | 673                                           | 068                             | 822                      | 070              |
| <i>dnaB-like</i> | Replicative DNA helicase                      | 074<br>388<br>550<br>523<br>570<br>645<br>686 | 179<br>220<br>284<br>617        | 037<br>073<br>094<br>361 | 420              |
| <i>dnaC</i>      | ATP-binding loader protein for DnaB           | 672                                           | 069                             | 821                      | 069              |
| <i>dnaE</i>      | DNA polymerase III, alpha subunit             | 591                                           | 129                             | 535                      | 697              |
| <i>polC</i>      | DNA polymerase III, alpha subunit             | 465                                           | 313                             | 541                      | 081<br>422       |
| <i>holA</i>      | DNA polymerase III, delta subunit             | 016                                           | 010                             | 145                      | 254              |
| <i>holB</i>      | DNA polymerase III, delta prime subunit       | 231                                           | 491                             | 168                      | 374              |
| <i>dnaX</i>      | DNA polymerase III, tau subunit               | 617                                           | 117                             | 623                      | 043              |
| <i>dnaN</i>      | DNA polymerase sliding clamp subunit          | 002                                           | 002                             | 002                      | 194              |
| <i>dnaG</i>      | DNA primase                                   | 524<br>549<br>569<br>572<br>627<br>644<br>685 | 108<br>178<br>219<br>285<br>616 | 614<br>360               | 305<br>415       |
| <i>dnaD</i>      | DNA replication protein BLAST                 | 609                                           | 144                             | 630                      | 051              |
| <i>priA</i>      | Primosomal protein, replication factor Y      | 154                                           | 565                             | 123                      | 317              |
| <i>ssb</i>       | Single-stranded DNA binding protein           | 010<br>041<br>319                             | 004<br>150<br>193               | 150<br>814               | 179<br>398       |

|             |                                                    |     |     |     |     |
|-------------|----------------------------------------------------|-----|-----|-----|-----|
|             |                                                    | 324 | 232 |     |     |
|             |                                                    | 359 | 271 |     |     |
|             |                                                    | 364 | 378 |     |     |
|             |                                                    | 396 |     |     |     |
|             |                                                    | 410 |     |     |     |
|             |                                                    | 512 |     |     |     |
|             |                                                    | 535 |     |     |     |
|             |                                                    | 564 |     |     |     |
|             |                                                    | 655 |     |     |     |
|             |                                                    | 699 |     |     |     |
|             |                                                    | 726 |     |     |     |
|             |                                                    | 759 |     |     |     |
| <i>rnhC</i> | Ribonuclease HIII                                  | 631 | 103 | 707 | 130 |
| <i>lig</i>  | NAD-dependent DNA ligase                           | 438 | 321 | 770 | 275 |
| <i>gyrA</i> | DNA gyrase subunit A (topoisomerase II)            | 499 | 254 | 214 | 196 |
| <i>gyrB</i> | DNA gyrase subunit B (topoisomerase II)            | 498 | 255 | 213 | 195 |
| <i>pmbA</i> | DNA gyrase modulator                               | 764 | 332 | 702 | 324 |
| <i>nrdA</i> | Ribonucleotide reductase, Coenzyme B12-dependent   | 054 | 025 | 056 | 187 |
| <i>nrdF</i> | Ribonucleotide/diphosphate reductase, subunit beta | 055 | 026 | 112 | 186 |
|             | putative telomere resolvase                        | -   | -   | -   | 103 |

### Supplementary Table 3 (ST3). Proteins related to chromosome segregation.

| Gene         | Description                     | OY-M<br>(PAM_) | AYWB<br>(AYWB_) | Paus<br>(PAa_0) | Pmal<br>(ATP_00) |
|--------------|---------------------------------|----------------|-----------------|-----------------|------------------|
| <i>spoVG</i> | Regulatory protein SpoVG family | 732            | 649             | 271             | 227              |
| <i>smc</i>   | Chromosome segregation ATPase   | 693            | 277             | -               | -                |
|              |                                 | 348            |                 |                 |                  |
|              |                                 | 037            |                 |                 |                  |
|              |                                 | 516            |                 |                 |                  |
|              |                                 | 380            |                 |                 |                  |

### Supplementary Table 4 (ST4). Recombination-related functions.

| Gene        | Description                                         | OY-M<br>(PAM_) | AYWB<br>(AYWB_) | Paus<br>(PAa_0) | Pmal<br>(ATP_00) |
|-------------|-----------------------------------------------------|----------------|-----------------|-----------------|------------------|
| <i>ruvA</i> | Holliday junction resolvosome DNA-binding subunit   | -              | -               | -               | 168              |
| <i>ruvB</i> | Holliday junction resolvosome helicase subunit      | -              | -               | -               | 167              |
| <i>ruvX</i> | Holliday junction resolvase-like protein            | 304            | 418             | 508             | 247              |
| <i>recU</i> | Holliday junction-specific endonuclease             | -              | -               | -               | 209              |
| <i>recA</i> | RecA/RadA recombinase                               | -              | -               | -               | 135              |
| <i>recG</i> | ATP-dependent RecG-like helicase                    | -              | -               | -               | 054              |
| <i>recO</i> | Recombinational DNA repair protein O (RecF pathway) | -              | -               | -               | 303              |
| <i>recR</i> | Recombinational DNA repair protein R                | -              | -               | -               | 045              |

(RecF pathway)

|             |                                   |     |     |     |   |
|-------------|-----------------------------------|-----|-----|-----|---|
| <i>rmuC</i> | RmuC-family protein               | 270 | 450 | 642 | - |
| <i>mgs1</i> | Recombination factor protein RarA | -   | 288 | -   | - |

### Supplementary Table 5 (ST5). DNA repair and degradation.

| Gene        | Description                                                         | OY-M<br>(PAM_)                                | AYWB<br>(AYWB_) | Paus<br>(PAa_0) | Pmal<br>(ATP_00)  |
|-------------|---------------------------------------------------------------------|-----------------------------------------------|-----------------|-----------------|-------------------|
| <i>uvrA</i> | Exonuclease ATPase subunit                                          | 450                                           | 336             | 699             | -                 |
| <i>uvrB</i> | Helicase subunit of the DNA excision repair complex                 | 763                                           | 399             | 453             | -                 |
| <i>uvrC</i> | Helicase subunit of the DNA excision repair complex                 | 433                                           | 398             | 452             | -                 |
| <i>uvrD</i> | Superfamily I DNA and RNA helicases                                 | 315<br>355<br>413<br>505<br>527<br>559<br>621 | 085<br>115      | 693             | 434               |
| <i>mutM</i> | Formamidopyrimidine-DNA glycolase (syn. nei, fbg)                   | 674                                           | 067             | 823             | 071               |
| <i>mutT</i> | NTP pyrophosphohydrolases including oxidative damage repair enzymes | 476                                           | 302             | 776             | 108               |
| <i>polA</i> | DNA polymerase I - 3'-5' exonuclease and polymerase domain          | 675<br>676                                    | 066             | 824             | 072               |
| <i>xseA</i> | Exonuclease VII, large subunit                                      | -                                             | -               | -               | 455               |
| <i>tatD</i> | Mg-dependent DNase                                                  | 605                                           | 140             | 690             | 152               |
| <i>srmB</i> | Superfamily II DNA and RNA helicases                                | 453<br>714                                    | 054<br>318      | 155<br>449      | 028<br>115<br>470 |
|             | Putative restriction endonuclease                                   | 777                                           | -               | -               | -                 |
| <i>hsdM</i> | Type I restriction-modification system methyltransferase subunit    | 619                                           | -               | -               | 220               |
| <i>hsdR</i> | Restriction enzymes type I helicase subunits and related helicases  | 618                                           | -               | -               | -                 |
| <i>ung</i>  | Uracil-DNA glycolase                                                | 163                                           | 556             | 521             | 230               |
| <i>nfo</i>  | Endonuclease IV                                                     | 454                                           | 317             | 448             | 027<br>471        |

### Supplementary Table 6 (ST6). Genes involved in modification and structure.

| Gene        | Description               | OY-M<br>(PAM_) | AYWB<br>(AYWB_) | Paus<br>(PAa_0) | Pmal<br>(ATP_00) |
|-------------|---------------------------|----------------|-----------------|-----------------|------------------|
| <i>topA</i> | Topoisomerase IA          | 279            | 442             | 634             | 075              |
| <i>gyrA</i> | DNA gyrase, alpha subunit | 499            | 254             | 214             | 196              |
| <i>gyrB</i> | DNA gyrase, beta subunit  | 498            | 255             | 213             | 195              |

|             |                                                                                      |     |     |     |     |
|-------------|--------------------------------------------------------------------------------------|-----|-----|-----|-----|
| <i>himA</i> | Nucleotid DNA-binding protein,<br>similar to integration host factor (IHF) and<br>HU | 043 | 192 | 042 | 119 |
|             |                                                                                      | 063 | 210 | 070 |     |
|             |                                                                                      | 242 | 230 | 198 |     |
|             |                                                                                      | 317 | 272 | 230 |     |
|             |                                                                                      | 325 | 377 | 321 |     |
|             |                                                                                      | 357 | 479 | 330 |     |
|             |                                                                                      | 365 |     | 376 |     |
|             |                                                                                      | 394 |     | 397 |     |
|             |                                                                                      | 402 |     | 422 |     |
|             |                                                                                      | 513 |     | 432 |     |
|             |                                                                                      | 534 |     | 683 |     |
|             |                                                                                      | 563 |     | 804 |     |
|             |                                                                                      | 654 |     |     |     |
|             |                                                                                      | 698 |     |     |     |
| 758         |                                                                                      |     |     |     |     |
|             | N6 adenine-specific DNA<br>methyltransferase                                         | 042 | 379 | 004 | 026 |
|             |                                                                                      | 299 | 424 | 043 | 243 |
|             |                                                                                      | 395 |     | 069 | 262 |
|             |                                                                                      | 409 |     | 199 | 472 |
|             |                                                                                      | 565 |     | 231 |     |
|             |                                                                                      |     |     | 250 |     |
|             |                                                                                      |     |     | 320 |     |
|             |                                                                                      |     |     | 327 |     |
|             |                                                                                      |     |     | 377 |     |
|             |                                                                                      |     |     | 421 |     |
|             |                                                                                      |     |     | 433 |     |
|             |                                                                                      |     |     | 438 |     |
|             |                                                                                      |     |     | 503 |     |
|             |                                                                                      |     |     | 739 |     |
|             |                                                                                      | 778 |     |     |     |
|             |                                                                                      | 803 |     |     |     |
| -           | C-5 cytosine-specific DNA methylase                                                  | 004 | -   | -   | -   |
|             | Putative methyltransferase                                                           |     |     | 291 |     |
|             |                                                                                      |     |     | 655 |     |
|             |                                                                                      |     |     | 722 |     |
|             |                                                                                      |     |     | 789 |     |

**Supplementary Table 7 (ST7). RNA polymerase and sigma factors.**

| <b>Gene</b> | <b>Description</b>                                                      | <b>OY-M</b><br>(PAM <sub>1</sub> ) | <b>AYWB</b><br>(AYWB <sub>1</sub> ) | <b>Paus</b><br>(PAa <sub>0</sub> ) | <b>Pmal</b><br>(ATP <sub>00</sub> ) |
|-------------|-------------------------------------------------------------------------|------------------------------------|-------------------------------------|------------------------------------|-------------------------------------|
| <i>rpoA</i> | DNA-directed RNA polymerase ( $\alpha$ subunit)                         | 227                                | 495                                 | 560                                | 367                                 |
| <i>rpoB</i> | Bifunctional DNA-directed RNA<br>polymerase, $\beta$ and $\beta'$ chain | 260                                | 461                                 | 665                                | 390                                 |
| <i>rpoC</i> | Bifunctional DNA-directed RNA<br>polymerase, $\beta$ and $\beta'$ chain | 261                                | 460                                 | 664                                | 391                                 |
| <i>rpoZ</i> | DNA-directed RNA polymerase $\omega$ chain                              | 736                                | 654                                 | 106                                | 448                                 |
| <i>rpoE</i> | DNA-directed RNA polymerase, delta<br>subunit                           | 614                                | 119                                 | 625                                | 046                                 |

|              |                                                                  |     |     |     |     |
|--------------|------------------------------------------------------------------|-----|-----|-----|-----|
| <i>rpoD</i>  | DNA-dependent RNA polymerase sigma subunits ( $\sigma_{70/32}$ ) | 628 | 107 | 613 | 306 |
|              |                                                                  | 408 | 194 | 258 | 397 |
|              |                                                                  | 702 | 233 |     |     |
|              |                                                                  | 760 | 359 |     |     |
|              |                                                                  |     | 380 |     |     |
|              | RNA polymerase sigma factor, fragment                            |     |     | 395 |     |
|              | RNA polymerase sigma factor                                      |     |     | 127 |     |
| <i>fliA/</i> | DNA-directed RNA polymerase                                      | 040 | 194 | 258 | 397 |
| <i>rpoF</i>  | specialized sigma subunit                                        | 320 | 206 | 316 |     |
|              |                                                                  | 323 | 354 | 409 |     |
|              |                                                                  | 360 |     | 723 |     |
|              |                                                                  | 363 |     | 790 |     |
|              |                                                                  | 511 |     | 815 |     |
|              |                                                                  | 536 |     |     |     |
|              |                                                                  | 656 |     |     |     |
|              |                                                                  | 700 |     |     |     |

**Supplementary Table 8 (ST8). Factors affecting the RNA polymerase.**

| Gene        | Description                                                            | OY-M<br>(PAM_) | AYWB<br>(AYWB_) | Paus<br>(PAa_0) | Pmal<br>(ATP_00) |
|-------------|------------------------------------------------------------------------|----------------|-----------------|-----------------|------------------|
| <i>greA</i> | Transcription elongation factor                                        | 302            | 420             | 506             | 246              |
| <i>nusA</i> | N utilization substance protein A                                      | 148            | 572             | 606             | 313              |
| <i>nusB</i> | N utilization substance protein B,<br>transcription termination factor | 443            | 327             | 835             | 469<br>029       |
| <i>nusG</i> | Transcription antitermination protein                                  | 225            | 466             | 670             | 385              |
| <i>spoT</i> | Guanosine-3',5'-bis(diphosphate) 3'-<br>pyrophosphohydrolase           | 126            | 596             | 767             | 181              |

**Supplementary Table 9 (ST9). Transcriptional regulators.**

| Gene        | Description                                                        | OY-M<br>(PAM_) | AYWB<br>(AYWB_) | Paus<br>(PAa_0) | Pmal<br>(ATP_00) |
|-------------|--------------------------------------------------------------------|----------------|-----------------|-----------------|------------------|
| <i>pepA</i> | Putative aminopeptidase (DNA-binding<br>transcriptional repressor) | -              | -               | 129             | 431              |
| <i>hrcA</i> | Negative regulator of class I heat shock<br>protein                | 706            | 059             | 557             | 204              |
|             | Putative cold shock protein (transcriptional<br>regulator)         | 671            | 070             | 820             | -                |
|             | Putative cold shock protein (transcriptional<br>regulator)         | -              | -               | -               | 295              |

**Supplementary Table 10 (ST10). tRNA synthetases.**

| Gene        | Description                                  | OY-M<br>(PAM_) | AYWB<br>(AYWB_) | Paus<br>(PAa_0) | Pmal<br>(ATP_00) |
|-------------|----------------------------------------------|----------------|-----------------|-----------------|------------------|
| <i>pheT</i> | Phenylalanyl-tRNA synthetase $\beta$ -chain  | 598            | 134             | 531             | 079              |
| <i>pheS</i> | Phenylalanyl-tRNA synthetase $\alpha$ -chain | 596            | 133             | 532             | 080              |
| <i>thrS</i> | Threonyl-tRNA synthetase                     | 745            | 663             | 018             | 165              |
| <i>proS</i> | Prolyl-tRNA synthetase                       | 246            | 475             | 678             | 435              |
| <i>alaS</i> | Alanyl-tRNA synthetase                       | 305            | 416             | 509             | 248              |
| <i>hisS</i> | Histidyl-tRNA synthetase                     | 127            | 594             | 485             | 270              |
| <i>glyS</i> | Glycyl-tRNA synthetase $\beta$ -chain        | -              | -               | -               | -                |
| <i>glyQ</i> | Glycyl-tRNA synthetase $\alpha$ -chain       | 626            | 109             | 615             | 304              |
| <i>argS</i> | Arginyl-tRNA synthetase                      | 455            | 316             | 540             | 436              |
| <i>glnS</i> | Glutamyl-tRNA synthetase                     | 620            | 116             | 694             | 201              |
| <i>aspS</i> | Aspartyl-tRNA synthetase                     | 128            | 593             | 486             | 271              |
| <i>leuS</i> | Leucyl-tRNA synthetase                       | 738            | 656             | 104             | 446              |
| <i>metG</i> | Methionyl-tRNA synthetase                    | 233            | 489             | 128             | 376              |
| <i>ileS</i> | Isoleucyl-tRNA synthetase                    | 184            | 535             | 346             | 252              |
| <i>cysS</i> | Cysteinyl-tRNA synthetase                    | 141            | 579             | 499             | 335              |
| <i>trpS</i> | Tryptophanyl-tRNA synthetase                 | 466            | 312             | 542             | 092              |
| <i>lysU</i> | Lysyl-tRNA synthetase (class II)             | 589            | 128             | 536             | 096              |
| <i>gltX</i> | Glutamyl-tRNA synthetase                     | 140            | 580             | 498             | 334              |
| <i>serS</i> | Seryl-tRNA synthetase                        | 083            | 632             | 596             | 132              |
| <i>valS</i> | Valyl-tRNA synthetase                        | 018            | 012             | 142             | 338              |
| <i>tyrS</i> | Tyrosyl-tRNA synthetase, class Ib            | 469            | 309             | 546             | 114              |
| <i>asnC</i> | asparaginyl-tRNA synthetase                  | 754            | 671             | 026             | 158              |

**Supplementary Table 11 (ST11). tRNAs predicted by tRNAScan-SE in the phytoplasma genomes (differences highlighted in bold letters).**

| Gene     | Amino acid    | OY-M            | AYWB                   | Paus     | Pmal |
|----------|---------------|-----------------|------------------------|----------|------|
| tRNA-Ala | Alanine       | 1               | 1                      | 1        | 1    |
| tRNA-Arg | Arginine      | 2               | 2                      | 2        | 2    |
| tRNA-Asn | Asparagine    | 1               | 1                      | 1        | 1    |
| tRNA-Asp | Aspartic acid | 1               | 1                      | 1        | 1    |
| tRNA-Cys | Cysteine      | 1               | 1                      | 1        | 1    |
| tRNA-Gln | Glutamine     | 1               | 1                      | <b>2</b> | 1    |
| tRNA-Glu | Glutamic acid | 1               | 1                      | 1        | 1    |
| tRNA-Gly | Glycine       | 2               | 2                      | 2        | 2    |
| tRNA-His | Histidine     | 1               | 1                      | <b>2</b> | 1    |
| tRNA-Ile | Isoleucine    | 2 <sup>*1</sup> | 2                      | 2        | 2    |
| tRNA-Leu | Leucine       | 4               | 4                      | <b>5</b> | 4    |
| tRNA-Lys | Lysine        | 1               | 1                      | 1        | 1    |
| tRNA-Met | Methionine    | 3               | 3                      | 3        | 3    |
| tRNA-Phe | Phenylalanine | 1               | 1                      | 1        | 1    |
| tRNA-Pro | Proline       | 1               | 1                      | 1        | 1    |
| tRNA-Ser | Serine        | 3               | <b>3</b> <sup>*2</sup> | 3        | 3    |
| tRNA-Thr | Threonine     | 2               | 2                      | 2        | 2    |
| tRNA-Trp | Tryptophan    | 1               | 1                      | 1        | 1    |
| tRNA-Tyr | Tyrosine      | 1               | 1                      | 1        | 1    |

|            |        |   |   |                 |   |
|------------|--------|---|---|-----------------|---|
| tRNA-Val   | Valine | 2 | 2 | 1               | 2 |
| tRNA-OTHER |        | / | / | 1 <sup>*3</sup> | / |

\*1 One additional tRNA was predicted at position 281032..281108 (this study)

\*2 One additional tRNA was predicted at position 277264..277354 (this study)

\*3 This tRNA is predicted as Pseudo-tRNA.

### Supplementary Table 12 (ST12). Factors affecting the RNA polymerase.

| Gene        | Description                                        | OY-M<br>(PAM_) | AYWB<br>(AYWB_) | Paus<br>(PAa_0) | Pmal<br>(ATP_00) |
|-------------|----------------------------------------------------|----------------|-----------------|-----------------|------------------|
| <i>trmE</i> | tRNA modification GTPase                           | 747            | 665             | 020             | 164              |
| <i>trmD</i> | tRNA (Guanine-N(1)-)-methyltransferase             | 471            | 307             | 548             | 439              |
|             | tRNA/rRNA methyltransferase protein                | 672*           | 468             | 672             | -                |
| <i>spoU</i> | tRNA/rRNA methyltransferase (SpoU)                 | 144            | 576             | -               | 212              |
| <i>miaA</i> | tRNA delta(2)-isopentenylpyrophosphate transferase | 275            | 446             | 638             | 125              |
| <i>truA</i> | Pseudouridylate synthase A                         | 229            | 493             | 170             | 372              |
| <i>truB</i> | tRNA pseudouridine 55 synthase                     | 237            | 484             | 783             | 326              |
|             | Probable pseudouridine synthase                    | 238            | 483             | 782             | 123              |
| <i>rluA</i> | pseudouridylate synthase                           | 131            | 590             | 489             | 274              |
| <i>rimM</i> | 16S rRNA processing protein                        | -              | -               | -               | 438              |
| <i>ksgA</i> | Dimethyladenosine transferase                      | 731            | 648             | 272             | 226              |
|             | Probable Dimethyladenosine transferase             | 306            | 415             | -               | 279              |
| <i>Pth</i>  | peptidyl-tRNA hydrolase                            | 152            | 567             | 610             | 223              |
| <i>mnmA</i> | tRNA-specific 2-thiouridylase                      | 125            | 597             | 766             | 182              |

\* original annotation differs from this assignment

### Supplementary Table 13 (ST13). Translation factors.

| Gene        | Description                                  | OY-M<br>(PAM_) | AYWB<br>(AYWB_) | Paus<br>(PAa_0) | Pmal<br>(ATP_00) |
|-------------|----------------------------------------------|----------------|-----------------|-----------------|------------------|
| <i>infA</i> | Translation initiation factor IF-1           | 223            | 499             | 564             | 363              |
| <i>infB</i> | Translation initiation factor IF-2           | 150            | 570             | 608             | 315              |
| <i>infC</i> | Translation initiation factor IF-3           | 744            | 662             | 095             | 441              |
| <i>tufB</i> | Elongation factor Tu                         | 265            | 456             | 660             | 395              |
| <i>tsf</i>  | Elongation factor Ts (EF-Ts)                 | 166            | 553             | 518             | 233              |
| <i>lepA</i> | GTP-binding protein LepA (elongation factor) | 445            | 330             | 222             | 289              |
| <i>fusA</i> | Elongation factor G 1 (EF-G 1)               | 264            | 457             | 661             | 394              |
| <i>efp</i>  | Translation elongation factor P (EF-P)       | 276            | 445             | 637             | 124              |
| <i>prfA</i> | Peptide chain release factor 1 (RF-1)        | 014            | 008             | 147             | 175              |
| <i>prfB</i> | Peptide chain release factor 2 (RF-2)        | 473            | 305             | 550             | 99               |
| <i>frr</i>  | Ribosome recycling factor                    | 168            | 551             | 516             | 235              |
| <i>sua5</i> | Putative translation factor (SUA5)           | 015            | 009             | 146             | 174              |
| <i>rbfA</i> | Ribosome-binding factor A                    | 151            | 569             | 609             | 316              |

**Supplementary Table 14 (ST14). Ribosomal proteins.**

| <b>Gene</b> | <b>Description</b>           | <b>OY-M</b><br>(PAM_) | <b>AYWB</b><br>(AYWB_) | <b>Paus</b><br>(PAa_0) | <b>Pmal</b><br>(ATP_00) |
|-------------|------------------------------|-----------------------|------------------------|------------------------|-------------------------|
| <i>rplA</i> | 50S ribosomal protein L1     | 257                   | 464                    | 668                    | 387                     |
| <i>rplB</i> | 50S ribosomal protein L2     | 203                   | 519                    | 584                    | 344                     |
| <i>rplC</i> | 50S ribosomal protein L3     | 200                   | 522                    | 587                    | 341                     |
| <i>rplD</i> | 50S ribosomal protein L4     | 201                   | 521                    | 586                    | 342                     |
| <i>rplE</i> | 50S ribosomal protein L5     | 212                   | 510                    | 575                    | 353                     |
| <i>rplF</i> | 50S ribosomal protein L6     | 215                   | 507                    | 572                    | 356                     |
| <i>rplI</i> | 50S ribosomal protein L9     | 012                   | 006                    | 149                    | 177                     |
| <i>rplJ</i> | 50S ribosomal protein L10    | 258                   | 463                    | 667                    | 388                     |
| <i>rplK</i> | 50S ribosomal protein L11    | 256                   | 465                    | 669                    | 386                     |
| <i>rplL</i> | 50S ribosomal protein L7/L12 | 259                   | 462                    | 666                    | 389                     |
| <i>rplM</i> | 50S ribosomal protein L13    | 138                   | 582                    | 496                    | 332                     |
| <i>rplN</i> | 50S ribosomal protein L14    | 210                   | 512                    | 577                    | 351                     |
| <i>rplO</i> | 50S ribosomal protein L15    | 219                   | 503                    | 568                    | 360                     |
| <i>rplP</i> | 50S ribosomal protein L16    | 207                   | 515                    | 580                    | 348                     |
| <i>rplQ</i> | 50S ribosomal protein L17    | 228                   | 494                    | 559                    | 368                     |
| <i>rplR</i> | 50S ribosomal protein L18    | 216                   | 506                    | 571                    | 357                     |
| <i>rplS</i> | 50S ribosomal protein L19    | 470                   | 308                    | 547                    | 440                     |
| <i>rplT</i> | 50S ribosomal protein L20    | 742                   | 660                    | 097                    | 443                     |
| <i>rplU</i> | 50S ribosomal protein L21    | 086                   | 629                    | 594                    | 284                     |
| <i>rplV</i> | 50S ribosomal protein L22    | 205                   | 517                    | 582                    | 346                     |
| <i>rplW</i> | 50S ribosomal protein L23    | 202                   | 520                    | 585                    | 343                     |
| <i>rplX</i> | 50S ribosomal protein L24    | 211                   | 511                    | 576                    | 352                     |
| <i>rpmA</i> | 50S ribosomal protein L27    | 088                   | 627                    | 592                    | 282                     |
| <i>rpmB</i> | 50S ribosomal protein L28    | 106                   | 603                    | 715                    | 278                     |
| <i>rpmC</i> | 50S ribosomal protein L29    | 208                   | 514                    | 579                    | 349                     |
| <i>rpmD</i> | 50S ribosomal protein L30    | 218                   | 504                    | 569                    | 359                     |
| <i>rpmE</i> | 50S ribosomal protein L31    | 105                   | 604                    | 714                    | 141                     |
| <i>rpmF</i> | 50S ribosomal protein L32    | 198                   | 525                    | 589                    | 308                     |
| <i>rpmG</i> | 50S ribosomal protein L33    | 244<br>253            | 476                    | 680                    | 383                     |
| <i>rpmH</i> | 50S ribosomal protein L34    | 247                   | 474                    | 677                    | 378                     |
| <i>rpmI</i> | 50S ribosomal protein L35    | 743                   | 661                    | 096                    | 442                     |
| <i>rpmJ</i> | 50S ribosomal protein L36    | 224                   | 498                    | 563                    | 364                     |
| <i>rpsB</i> | 30S ribosomal protein S2     | 165                   | 554                    | 519                    | 232                     |
| <i>rpsC</i> | 30S ribosomal protein S3     | 206                   | 516                    | 581                    | 347                     |
| <i>rpsD</i> | 30S ribosomal protein S4     | 586                   | 241                    | 088                    | 310                     |
| <i>rpsE</i> | 30S ribosomal protein S5     | 217                   | 505                    | 570                    | 358                     |
| <i>rpsF</i> | 30S ribosomal protein S6     | 009                   | 003                    | 152                    | 180                     |
| <i>rpsG</i> | 30S ribosomal protein S7     | 263                   | 458                    | 662                    | 393                     |
| <i>rpsH</i> | 30S ribosomal protein S8     | 214                   | 508                    | 573                    | 355                     |
| <i>rpsI</i> | 30S ribosomal protein S9     | 139                   | 581                    | 497                    | 333                     |
| <i>rpsJ</i> | 30S ribosomal protein S10    | 199                   | 524                    | 588                    | 340                     |
| <i>rpsK</i> | 30S ribosomal protein S11    | 226                   | 496                    | 561                    | 366                     |
| <i>rpsL</i> | 30S ribosomal protein S12    | 262                   | 459                    | 663                    | 392                     |
| <i>rpsM</i> | 30S ribosomal protein S13    | 225                   | 497                    | 562                    | 365                     |
| <i>rpsN</i> | 30S ribosomal protein S14    | 213                   | 509                    | 574                    | 354                     |
| <i>rpsO</i> | 30S ribosomal protein S15    | 136                   | 585                    | 494                    | 269                     |
| <i>rpsP</i> | 30S ribosomal protein S16    | 472                   | 306                    | 549                    | 437                     |



|             |                           |     |     |     |     |
|-------------|---------------------------|-----|-----|-----|-----|
| <i>rpsQ</i> | 30S ribosomal protein S17 | 209 | 513 | 578 | 350 |
| <i>rpsR</i> | 30S ribosomal protein S18 | 011 | 005 | 150 | 178 |
| <i>rpsS</i> | 30S ribosomal protein S19 | 204 | 518 | 583 | 345 |
| <i>rpsT</i> | 30S ribosomal protein S20 | 081 | 633 | 599 | 133 |
| <i>rpsU</i> | 30S ribosomal protein S21 | 623 | 112 | 618 | 300 |

### Supplementary Table 15 (ST15). Modifying and accessory factors.

| Gene        | Description                                               | OY-M<br>(PAM_) | AYWB<br>(AYWB_) | Paus<br>(PAa_0) | Pmal<br>(ATP_00) |
|-------------|-----------------------------------------------------------|----------------|-----------------|-----------------|------------------|
| <i>era</i>  | GTP-binding protein Era<br>(cell cycle/ribosome assembly) | 625            | 110             | 616             | 302              |
| <i>engA</i> | GTP-binding protein EngA<br>(ribosome assembly)           | 240            | 481             | 780             | 121              |
| <i>engB</i> | ribosome biogenesis GTP-binding protein                   | 017            | 011             | 143             | 102              |
| <i>engC</i> | GTPase EngC                                               | 182*           | 537             | 348             | 078              |
| <i>engD</i> | GTP-dependent nucleic acid-binding<br>protein EngD        | 183            | 536             | 347             | 251              |
| <i>obgE</i> | GTPase ObgE                                               | 089            | 626             | 591             | 281              |
|             | ribosome biogenesis GTP-binding protein<br>YlqF/GTPase    | 278*           | 443             | 635             | 076*             |

\* original annotation differs from this assignment; this assignment is based on sequence homology and Pfam.

### Supplementary Table 16 (ST16). Modifying and accessory factors.

| Gene | Description | OY-M<br>(PAM_) | AYWB<br>(AYWB_) | Paus<br>(PAa_0) | Pmal<br>(ATP_00) |
|------|-------------|----------------|-----------------|-----------------|------------------|
| YkqC | RNase J1/J2 | 633*           | 101*            | 011*            | 211*             |

\* original annotation differs from this assignment

### Supplementary Table 17 (ST17). Heat shock proteins and chaperons.

| Gene         | Description                | OY-M<br>(PAM_) | AYWB<br>(AYWB_) | Paus<br>(PAa_0) | Pmal<br>(ATP_00) |
|--------------|----------------------------|----------------|-----------------|-----------------|------------------|
| <i>dnaJ</i>  | Chaperone DnaJ             | 703            | 062             | 554             | 207              |
| <i>dnaK</i>  | Chaperone DnaK             | 704            | 061             | 555             | 206              |
| <i>grpE</i>  | Chaperone GrpE             | 705            | 060             | 556             | 205              |
| <i>groEL</i> | Chaperonin 60kD subunit    | 121            | 600             | 761             | 185              |
| <i>groES</i> | Chaperonin 10kD subunit    | 120            | 601             | 760             | 184              |
|              | Trigger factor (TF)        | 449            | 334             | 700             | 297              |
| <i>lon</i>   | ATP-dependent Lon protease | 448            | 333             | 701             | 298              |
| <i>ibpA</i>  | Molecular chaperone        | 028            | 017             | 717             | -                |

**Supplementary Table 18 (ST18). Other proteins involved in translation.**

| <b>Gene</b> | <b>Description</b>                        | <b>OY-M</b><br>(PAM_) | <b>AYWB</b><br>(AYWB_) | <b>Paus</b><br>(PAa_0) | <b>Pmal</b><br>(ATP_00) |
|-------------|-------------------------------------------|-----------------------|------------------------|------------------------|-------------------------|
| <i>map</i>  | Methionine aminopeptidase                 | 222                   | 500                    | 565                    | 362                     |
| <i>rnpA</i> | Ribonuclease P protein component          | 248                   | 473                    | 676                    | 379                     |
| <i>pnp</i>  | Polyribonucleotide nucleotidyltransferase | 251                   | 470                    | 674                    | 381                     |
| <i>pcnB</i> | Poly(A)polymerase                         | 102                   | 607                    | 711                    | 238                     |
| <i>smpB</i> | SsrA-binding protein                      | 146                   | 574                    | 603                    | 328                     |

**Supplementary Table 19 (ST19). Cell envelope related- proteins.**

| <b>Gene</b> | <b>Description</b>                                     | <b>OY-M</b><br>(PAM_) | <b>AYWB</b><br>(AYWB_) | <b>Paus</b><br>(PAa_0) | <b>Pmal</b><br>(ATP_00) |
|-------------|--------------------------------------------------------|-----------------------|------------------------|------------------------|-------------------------|
| <i>mraW</i> | Methyltransferase involved in cell envelope biogenesis | 735                   | 652                    | 107                    | 449                     |

**Supplementary Table 20 (ST20). Proteins involved in lipopolysaccharide synthesis.**

| <b>Gene</b> | <b>Description</b>                               | <b>OY-M</b><br>(PAM_) | <b>AYWB</b><br>(AYWB_) | <b>Paus</b><br>(PAa_0) | <b>Pmal</b><br>(ATP_00) |
|-------------|--------------------------------------------------|-----------------------|------------------------|------------------------|-------------------------|
| <i>rfaG</i> | Glycosyltransferase involved in LPS biosynthesis | 008                   | -                      | -                      | 083                     |

**Supplementary Table 21 (ST21). Proteins involved in cell division.**

| <b>Gene</b> | <b>Description</b>                                      | <b>OY-M</b><br>(PAM_) | <b>AYWB</b><br>(AYWB_) | <b>Paus</b><br>(PAa_0) | <b>Pmal</b><br>(ATP_00) |
|-------------|---------------------------------------------------------|-----------------------|------------------------|------------------------|-------------------------|
| <i>ftsH</i> | Cell division protein FtsH homolog                      | 591*                  | 130                    | 488*                   | 273*                    |
| <i>ftsY</i> | Cell division protein FtsY homolog                      | 064                   | 679                    | 827                    | 074                     |
| <i>gidB</i> | Methyltransferase, glucose inhibited division protein B | 267                   | 454                    | 645                    | -                       |
| <i>gidA</i> | Glucose inhibited division protein A                    | 268                   | 453                    | 644                    | 137                     |

\* original annotation differs from this assignment

**Supplementary Table 22 (ST22). Immunodominant membrane proteins.**

| Gene       | Description                                                    | OY-M<br>(PAM_) | AYWB<br>(AYWB_) | Paus<br>(PAa_0) | Pmal<br>(ATP_00) |
|------------|----------------------------------------------------------------|----------------|-----------------|-----------------|------------------|
| <i>amp</i> | antigenic membrane protein/<br>immunodominant membrane protein | 122            | 599             | 762             | -                |
| <i>imp</i> | immunodominant membrane protein<br>ArsC family/Spx protein     | -              | -               | -               | 050              |

**Supplementary Table 23 (ST23). Predicted integral membrane proteins caring a single transmembrane helix (TM) at least.**

| OY-M<br>(PAM_) | TM(s) | AYWB<br>(AYWB_) | TM(s) | Paus<br>(PAa_0) | TM(s) | Pmal<br>(ATP_00) | TM(s) |
|----------------|-------|-----------------|-------|-----------------|-------|------------------|-------|
| 005            | 6     | 006             | 2     | 015             | 1     | 002              | 5     |
| 006            | 6     | 013             | 5     | 016             | 1     | 003              | 9     |
| 012            | 2     | 015             | 4     | 017             | 1     | 004              | 8     |
| 019            | 4     | 018             | 10    | 019             | 2     | 007              | 4     |
| 021            | 1     | 019             | 1     | 023             | 6     | 009              | 7     |
| 022            | 3     | 023             | 1     | 024             | 6     | 011*             | 1     |
| 027            | 2     | 024             | 2     | 027             | 1     | 012              | 2     |
| 029            | 1     | 027             | 3     | 047             | 1     | 013              | 4     |
| 030            | 10    | 029             | 6     | 048             | 1     | 014              | 3     |
| 031            | 1     | 042             | 1     | 065             | 2     | 015              | 6     |
| 046            | 2     | 052             | 13    | 080             | 2     | 017              | 2     |
| 048            | 1     | 053             | 6     | 081             | 1     | 018              | 6     |
| 057            | 7     | 055             | 1     | 083             | 2     | 019              | 12    |
| 058            | 3     | 063             | 1     | 086             | 1     | 020              | 1     |
| 061            | 2     | 073             | 1     | 089             | 10    | 021              | 1     |
| 065            | 1     | 080             | 1     | 090             | 3     | 022              | 1     |
| 066            | 2     | 081             | 2     | 092             | 2     | 023              | 2     |
| 068            | 1     | 082             | 1     | 098             | 6     | 032              | 6     |
| 077            | 3     | 083             | 7     | 109             | 3     | 033              | 1     |
| 078            | 6     | 084             | 1     | 110             | 12    | 034              | 2     |
| 082            | 1     | 091             | 1     | 111             | 1     | 035              | 1     |
| 092            | 1     | 092             | 2     | 112             | 1     | 036              | 1     |
| 094            | 19    | 093             | 6     | 113             | 2     | 038              | 1     |
| 095            | 1     | 094             | 6     | 114             | 6     | 039              | 1     |
| 096            | 4     | 096             | 1     | 115             | 5     | 040              | 1     |
| 102            | 1     | 105             | 1     | 116             | 1     | 041              | 1     |
| 107            | 1     | 120             | 6     | 119             | 1     | 047              | 7     |
| 109            | 1     | 121             | 1     | 120             | 7     | 048              | 1     |
| 111            | 1     | 124             | 2     | 125             | 2     | 050              | 1     |
| 114            | 2     | 125             | 6     | 130             | 2     | 056              | 1     |
| 119            | 6     | 132             | 3     | 132             | 1     | 058              | 1     |
| 126            | 1     | 135             | 4     | 133             | 6     | 061              | 3     |
| 130            | 2     | 145             | 1     | 134             | 6     | 066              | 6     |
| 134            | 5     | 146             | 1     | 136             | 2     | 067              | 6     |
| 153            | 4     | 148             | 1     | 137             | 2     | 068              | 1     |
| 156            | 1     | 149             | 1     | 139             | 4     | 076              | 1     |
| 157            | 1     | 152             | 1     | 141             | 5     | 077              | 1     |

|     |    |     |    |     |    |     |    |
|-----|----|-----|----|-----|----|-----|----|
| 158 | 7  | 153 | 1  | 149 | 2  | 082 | 6  |
| 162 | 3  | 155 | 1  | 153 | 2  | 084 | 6  |
| 169 | 9  | 157 | 1  | 154 | 1  | 085 | 6  |
| 173 | 1  | 158 | 1  | 156 | 1  | 086 | 1  |
| 176 | 6  | 159 | 1  | 157 | 1  | 087 | 1  |
| 177 | 4  | 160 | 1  | 158 | 1  | 088 | 4  |
| 180 | 9  | 161 | 1  | 160 | 1  | 098 | 3  |
| 186 | 10 | 162 | 7  | 162 | 1  | 101 | 4  |
| 189 | 6  | 166 | 2  | 163 | 1  | 103 | 1  |
| 190 | 6  | 167 | 1  | 165 | 10 | 104 | 13 |
| 191 | 1  | 173 | 1  | 168 | 1  | 107 | 12 |
| 196 | 1  | 177 | 1  | 171 | 11 | 110 | 6  |
| 220 | 10 | 183 | 2  | 173 | 9  | 111 | 6  |
| 232 | 1  | 185 | 3  | 177 | 5  | 127 | 1  |
| 235 | 2  | 186 | 1  | 178 | 5  | 128 | 1  |
| 241 | 1  | 187 | 1  | 180 | 1  | 129 | 2  |
| 243 | 5  | 188 | 1  | 186 | 2  | 134 | 6  |
| 249 | 7  | 189 | 1  | 192 | 1  | 136 | 1  |
| 252 | 11 | 190 | 1  | 202 | 1  | 138 | 2  |
| 254 | 3  | 202 | 1  | 203 | 1  | 143 | 2  |
| 258 | 1  | 211 | 1  | 204 | 1  | 145 | 1  |
| 269 | 2  | 212 | 1  | 205 | 2  | 146 | 1  |
| 270 | 1  | 214 | 1  | 218 | 1  | 149 | 1  |
| 272 | 1  | 218 | 1  | 219 | 1  | 150 | 2  |
| 277 | 1  | 224 | 1  | 220 | 2  | 151 | 13 |
| 280 | 12 | 225 | 1  | 221 | 1  | 160 | 6  |
| 282 | 12 | 228 | 2  | 223 | 6  | 161 | 6  |
| 286 | 8  | 229 | 1  | 234 | 1  | 169 | 1  |
| 288 | 1  | 236 | 1  | 235 | 1  | 173 | 5  |
| 289 | 1  | 237 | 1  | 238 | 2  | 177 | 2  |
| 297 | 1  | 242 | 10 | 241 | 1  | 183 | 1  |
| 298 | 1  | 243 | 3  | 242 | 2  | 188 | 1  |
| 306 | 7  | 256 | 2  | 243 | 1  | 191 | 5  |
| 307 | 2  | 257 | 2  | 244 | 1  | 192 | 1  |
| 308 | 6  | 261 | 2  | 246 | 1  | 203 | 7  |
| 311 | 2  | 262 | 5  | 251 | 1  | 221 | 10 |
| 312 | 1  | 263 | 1  | 266 | 6  | 222 | 8  |
| 313 | 7  | 265 | 5  | 267 | 5  | 228 | 8  |
| 314 | 1  | 269 | 1  | 268 | 1  | 229 | 2  |
| 316 | 1  | 274 | 1  | 269 | 2  | 236 | 9  |
| 326 | 1  | 275 | 1  | 270 | 8  | 241 | 1  |
| 327 | 2  | 276 | 2  | 312 | 1  | 242 | 1  |
| 329 | 1  | 279 | 2  | 313 | 1  | 253 | 5  |
| 347 | 1  | 292 | 1  | 314 | 1  | 259 | 1  |
| 349 | 2  | 294 | 1  | 318 | 7  | 265 | 2  |
| 351 | 2  | 297 | 1  | 329 | 1  | 267 | 1  |
| 352 | 1  | 300 | 1  | 333 | 1  | 272 | 2  |
| 353 | 6  | 303 | 1  | 336 | 1  | 273 | 2  |
| 354 | 1  | 314 | 6  | 337 | 1  | 276 | 3  |
| 366 | 1  | 315 | 6  | 339 | 1  | 279 | 7  |
| 367 | 2  | 316 | 1  | 345 | 10 | 280 | 5  |
| 369 | 1  | 319 | 2  | 380 | 1  | 291 | 6  |
| 378 | 1  | 320 | 6  | 381 | 1  | 292 | 6  |
| 379 | 2  | 329 | 1  | 382 | 1  | 293 | 2  |
| 382 | 1  | 342 | 1  | 383 | 2  | 299 | 2  |
| 383 | 2  | 345 | 2  | 385 | 2  | 309 | 5  |

|     |    |     |    |     |    |     |    |
|-----|----|-----|----|-----|----|-----|----|
| 392 | 1  | 351 | 1  | 389 | 1  | 311 | 10 |
| 403 | 1  | 353 | 2  | 390 | 1  | 312 | 3  |
| 404 | 1  | 357 | 1  | 393 | 1  | 318 | 7  |
| 405 | 2  | 358 | 4  | 398 | 1  | 320 | 1  |
| 412 | 1  | 366 | 1  | 407 | 7  | 322 | 4  |
| 414 | 1  | 368 | 1  | 416 | 1  | 327 | 1  |
| 415 | 4  | 369 | 1  | 417 | 1  | 330 | 5  |
| 416 | 1  | 371 | 1  | 418 | 1  | 331 | 2  |
| 417 | 2  | 373 | 2  | 436 | 1  | 361 | 9  |
| 418 | 2  | 376 | 1  | 438 | 1  | 371 | 9  |
| 419 | 1  | 385 | 2  | 440 | 1  | 375 | 1  |
| 755 | 1  | 392 | 1  | 446 | 2  | 379 | 1  |
| 756 | 1  | 404 | 3  | 450 | 6  | 380 | 7  |
| 761 | 2  | 405 | 2  | 457 | 2  | 382 | 1  |
| 436 | 5  | 408 | 3  | 467 | 1  | 384 | 3  |
| 437 | 1  | 409 | 1  | 481 | 1  | 388 | 1  |
| 444 | 1  | 413 | 6  | 483 | 9  | 396 | 1  |
| 446 | 2  | 414 | 2  | 484 | 9  | 400 | 1  |
| 457 | 6  | 415 | 7  | 487 | 1  | 401 | 3  |
| 458 | 2  | 425 | 1  | 488 | 2  | 404 | 1  |
| 460 | 3  | 426 | 1  | 492 | 6  | 405 | 1  |
| 461 | 1  | 432 | 2  | 501 | 1  | 406 | 1  |
| 462 | 2  | 433 | 1  | 502 | 1  | 412 | 2  |
| 475 | 1  | 435 | 11 | 515 | 9  | 413 | 1  |
| 477 | 1  | 439 | 12 | 522 | 2  | 416 | 1  |
| 479 | 1  | 441 | 12 | 526 | 1  | 427 | 7  |
| 483 | 2  | 444 | 1  | 530 | 4  | 429 | 4  |
| 485 | 1  | 448 | 1  | 533 | 3  | 433 | 5  |
| 487 | 5  | 450 | 1  | 538 | 5  | 444 | 6  |
| 489 | 1  | 452 | 2  | 539 | 2  | 453 | 1  |
| 490 | 5  | 455 | 7  | 541 | 1  | 456 | 1  |
| 494 | 1  | 463 | 1  | 543 | 5  | 459 | 1  |
| 495 | 1  | 467 | 3  | 552 | 1  | 460 | 1  |
| 507 | 1  | 468 | 1  | 553 | 1  | 463 | 1  |
| 508 | 6  | 469 | 10 | 558 | 1  | 464 | 2  |
| 509 | 1  | 471 | 2  | 567 | 10 | 465 | 1  |
| 510 | 2  | 472 | 7  | 590 | 3  | 466 | 6  |
| 515 | 2  | 477 | 6  | 597 | 1  | 475 | 2  |
| 517 | 1  | 479 | 1  | 598 | 1  | 476 | 1  |
| 528 | 1  | 488 | 2  | 600 | 1  | 477 | 1  |
| 529 | 3  | 490 | 1  | 604 | 6  | 478 | 1  |
| 530 | 3  | 529 | 1  | 626 | 7  | 479 | 12 |
| 531 | 2  | 530 | 6  | 629 | 1  | 480 | 6  |
| 532 | 1  | 531 | 6  | 633 | 12 | 481 | 2  |
| 539 | 1  | 533 | 11 | 635 | 1  | 483 | 6  |
| 541 | 1  | 534 | 6  | 636 | 1  | 484 | 3  |
| 555 | 2  | 539 | 9  | 640 | 1  | 485 | 4  |
| 556 | 1  | 543 | 5  | 641 | 1  | 486 | 2  |
| 557 | 7  | 544 | 6  | 642 | 1  | 489 | 7  |
| 558 | 1  | 550 | 9  | 643 | 2  | 491 | 4  |
| 561 | 1  | 557 | 2  | 648 | 1  | 494 | 8  |
| 562 | 1  | 559 | 1  | 649 | 1  | 495 | 9  |
| 575 | 1  | 561 | 8  | 671 | 3  | 496 | 5  |
| 580 | 1  | 562 | 1  | 673 | 9  |     |    |
| 584 | 3  | 566 | 4  | 681 | 6  |     |    |
| 585 | 10 | 568 | 1  | 685 | 1  |     |    |

|     |    |     |    |     |    |
|-----|----|-----|----|-----|----|
| 587 | 3  | 583 | 2  | 692 | 2  |
| 588 | 6  | 586 | 1  | 695 | 3  |
| 595 | 3  | 587 | 5  | 696 | 4  |
| 599 | 5  | 591 | 2  | 697 | 1  |
| 604 | 2  | 599 | 2  | 704 | 1  |
| 610 | 1  | 602 | 6  | 706 | 1  |
| 613 | 7  | 615 | 1  | 707 | 1  |
| 638 | 1  | 619 | 4  | 709 | 2  |
| 639 | 4  | 620 | 2  | 729 | 1  |
| 649 | 1  | 621 | 9  | 742 | 1  |
| 650 | 1  | 622 | 9  | 749 | 2  |
| 652 | 2  | 624 | 1  | 755 | 1  |
| 657 | 1  | 635 | 6  | 756 | 1  |
| 658 | 1  | 636 | 1  | 757 | 6  |
| 660 | 6  | 650 | 8  | 758 | 6  |
| 661 | 6  | 651 | 10 | 768 | 13 |
| 662 | 2  | 659 | 6  | 772 | 1  |
| 663 | 1  | 667 | 1  | 774 | 2  |
| 670 | 1  | 668 | 6  | 779 | 10 |
| 680 | 4  | 669 | 6  | 785 | 1  |
| 691 | 2  |     |    | 792 | 7  |
| 694 | 2  |     |    | 797 | 2  |
| 696 | 1  |     |    | 798 | 3  |
| 707 | 1  |     |    | 799 | 1  |
| 718 | 6  |     |    | 800 | 1  |
| 719 | 1  |     |    | 813 | 7  |
| 720 | 10 |     |    | 816 | 6  |
| 727 | 1  |     |    | 817 | 1  |
| 733 | 8  |     |    | 822 | 1  |
| 734 | 12 |     |    | 829 | 1  |
| 735 | 1  |     |    | 834 | 1  |
| 741 | 6  |     |    | 839 | 1  |
| 749 | 1  |     |    |     |    |
| 751 | 6  |     |    |     |    |
| 753 | 1  |     |    |     |    |

**Supplementary Table 24 (ST24). Predicted integral membrane proteins caring a single transmembrane helix (TM) and a signal peptide at least.**

| OY-M<br>(PAM_) | TM(s) | AYWB<br>(AYWB_) | TM(s) | Paus<br>(PAa_0) | TM(s) | Pmal<br>(ATP_00) | TM(s) |
|----------------|-------|-----------------|-------|-----------------|-------|------------------|-------|
| 016            | 1     | 023             | 5     | 138             | 1     | 010              | 1     |
| 028            | 5     | 059             | 5     | 406             | 1     | 117              | 5     |
| 114            | 1     | 091             | 1     | 460             | 3     | 148              | 1     |
| 191            | 1     | 122             | 1     | 523             | 1     | 376              | 1     |
| 383            | 3     | 185             | 5     | 611             | 3     | 488              | 1     |
| 395            | 1     | 266             | 6     | 675             | 6     |                  |       |
| 428            | 1     | 295             | 1     | 762             | 1     |                  |       |
| 502            | 9     | 456             | 5     | 812             | 1     |                  |       |
| 625            | 1     | 464             | 2     | 818             | 1     |                  |       |
|                |       | 497             | 5     | 828             | 1     |                  |       |
|                |       | 502             | 1     |                 |       |                  |       |
|                |       | 750             | 5     |                 |       |                  |       |

**Supplementary Table 25 (ST25). Secretion apparatus.**

| <b>Gene</b> | <b>Description</b>                  | <b>OY-M</b><br>(PAM_) | <b>AYWB</b><br>(AYWB_) | <b>Paus</b><br>(PAa_0) | <b>Pmal</b><br>(ATP_00) |
|-------------|-------------------------------------|-----------------------|------------------------|------------------------|-------------------------|
| <i>secA</i> | Preprotein translocase subunit SecA | 474                   | 304                    | 551                    | 100                     |
| <i>secE</i> | Preprotein translocase subunit SecE | 254                   | 467                    | 671                    | 384                     |
| <i>secY</i> | Preprotein translocase subunit SecY | 220                   | 502                    | 567                    | 361                     |
| <i>yidC</i> | Preprotein translocase subunit yidC | 249                   | 472                    | 675                    | 380                     |

**Supplementary Table 26 (ST26). Predicted secreted proteins.**

| <b>OY-M</b><br>(PAM_) | <b>AYWB</b><br>(AYWB_) | <b>Paus</b><br>(PAa_0) | <b>Pmal</b><br>(ATP_00) |
|-----------------------|------------------------|------------------------|-------------------------|
| 049                   |                        |                        |                         |
| 069                   | 022                    |                        |                         |
| 070                   | 032                    | 022                    |                         |
| 125                   | 033                    | 030                    |                         |
| 133                   | 122                    | 060                    |                         |
| 160                   | 127                    | 064                    |                         |
| 161                   | 129                    | 074                    | 006                     |
| 195                   | 131                    | 105                    | 025                     |
| 233                   | 168                    | 185                    | 031                     |
| 271                   | 169                    | 193                    | 037                     |
| 330                   | 174                    | 217                    | 049                     |
| 331                   | 203                    | 225                    | 090                     |
| 332                   | 240                    | 255                    | 120                     |
| 346                   | 245                    | 263                    | 147                     |
| 356                   | 258                    | 276                    | 182                     |
| 370                   | 259                    | 288                    | 189                     |
| 371                   | 280                    | 310                    | 197                     |
| 372                   | 295                    | 326                    | 257                     |
| 393                   | 339                    | 331                    | 258                     |
| 484                   | 340                    | 335                    | 261                     |
| 486                   | 346                    | 369                    | 266                     |
| 514                   | 367                    | 396                    | 268                     |
| 518                   | 370                    | 402                    | 287                     |
| 519                   | 387                    | 469                    | 426                     |
| 540                   | 402                    | 478                    | 447                     |
| 542                   | 449                    | 491                    | 458                     |
| 576                   | 480                    | 603                    | 461                     |
| 577                   | 489                    | 628                    | 462                     |
| 582                   | 558                    | 708                    | 467                     |
| 591                   | 588                    | 726                    | 473                     |
| 611                   | 595                    | 728                    | 492                     |
| 643                   | 597                    | 748                    |                         |
| 653                   | 638                    | 766                    |                         |
| 690                   | 640                    | 809                    |                         |
| 710                   | 645                    | 837                    |                         |
| 737                   | 655                    |                        |                         |
| 765                   | 658                    |                        |                         |

**Supplementary Table 27 (ST27). Signal recognition particle (SRP) pathway associated proteins.**

| <b>Gene</b> | <b>Description</b>                         | <b>OY-M</b><br>(PAM_) | <b>AYWB</b><br>(AYWB_) | <b>Paus</b><br>(PAa_0) | <b>Pmal</b><br>(ATP_00) |
|-------------|--------------------------------------------|-----------------------|------------------------|------------------------|-------------------------|
| <i>ftsY</i> | Cell division protein, SRP docking protein | 679                   | 064                    | 827                    | 074                     |
| <i>ffh</i>  | Signal recognition particle protein        | 678                   | 065                    | 826                    | 073                     |
| <i>yidC</i> | Preprotein translocase subunit YidC        | 249                   | 472                    | 675                    | 380                     |

**Supplementary Table 28 (ST28). Putative complete ABC transporter subunits with assignment.**

| <b>Gene</b>  | <b>Description</b>                                                                                                                                                                 | <b>OY-M</b><br>(PAM_) | <b>AYWB</b><br>(AYWB_) | <b>Paus</b><br>(PAa_0) | <b>Pmal</b><br>(ATP_00) |
|--------------|------------------------------------------------------------------------------------------------------------------------------------------------------------------------------------|-----------------------|------------------------|------------------------|-------------------------|
| <i>potA</i>  | ABC-type spermidine/putrescine transport system, ATPase component                                                                                                                  | 659                   | 095                    | 135                    | 290                     |
| <i>potB</i>  | ABC-type spermidine/putrescine transport system, permease component I                                                                                                              | 660                   | 094                    | 134                    | 291                     |
| <i>potC</i>  | ABC-type spermidine/putrescine transport system, permease component II                                                                                                             | 661                   | 093                    | 133                    | 292                     |
| <i>potD</i>  | ABC-type spermidine/putrescine transport system, periplasmic component                                                                                                             | 662                   | 092                    | 132                    | 293                     |
| <i>znuA</i>  | ABC-type Mn/Zn transport system, periplasmic component                                                                                                                             | 092                   | 624                    | 481                    | 492                     |
| <i>znuC</i>  | ABC-type Mn/Zn transport system, ATPase component                                                                                                                                  | 093                   | 623                    | 482                    | 493                     |
| <i>znuB</i>  | ABC-type Mn/Zn transport system, permease component                                                                                                                                | 094                   | 622<br>621             | 483<br>484             | 494<br>495              |
| <i>znuA2</i> | ABC-type Mn/Zn transport system, periplasmic component                                                                                                                             | /                     | /                      | /                      | 006                     |
| <i>znuC2</i> | ABC-type Mn/Zn transport system, ATPase component                                                                                                                                  | /                     | /                      | /                      | 005                     |
| <i>znuB2</i> | ABC-type Mn/Zn transport system, permease component                                                                                                                                | /                     | /                      | /                      | 004<br>003              |
| <i>malK</i>  | ABC-type sugar transport system (probably encoding maltose/maltodextrin transporter subunit, also similar to glycerol-3-phosphate transporter UgpC subunit), ATPase component      | 752                   | 670                    | 025                    | 159                     |
| <i>malF</i>  | ABC-type sugar transport system (probably encoding maltose/maltodextrin transporter subunit, also similar to glycerol-3-phosphate transporter UgpA subunit), permease component I  | 751                   | 669                    | 024                    | 160                     |
| <i>malG</i>  | ABC-type sugar transport system (probably encoding maltose/maltodextrin transporter subunit, also similar to glycerol-3-phosphate transporter UgpE subunit), permease component II | 750                   | 668                    | 023                    | 161                     |



|              |                                                                                                                                                                                    |      |      |            |     |
|--------------|------------------------------------------------------------------------------------------------------------------------------------------------------------------------------------|------|------|------------|-----|
| <i>malE</i>  | ABC-type sugar transport system (probably encoding maltose/maltodextrin transporter subunit, also similar to glycerol-3-phosphate transporter UgpB subunit), periplasmic component | 749  | 667  | 022        | 162 |
| <i>dppF</i>  | ABC-type dipeptide/oligopeptide transport system, ATPase component I                                                                                                               | 193* | 527  | 753        | 065 |
| <i>dppD</i>  | ABC-type dipeptide/oligopeptide transport system, ATPase component II                                                                                                              | 192  | 528  | 754        | 064 |
| <i>dppA</i>  | ABC-type dipeptide/oligopeptide transport system, periplasmic component                                                                                                            | 191  | 529  | 755<br>756 | 068 |
| <i>dppB</i>  | ABC-type dipeptide/oligopeptide transport system, permease component I                                                                                                             | 190  | 530  | 757        | 067 |
| <i>dppC</i>  | ABC-type dipeptide/oligopeptide transport system, permease component II                                                                                                            | 189  | 531  | 758        | 066 |
| <i>metN</i>  | ABC-type methionine transport system, ATPase component                                                                                                                             | 132  | 589  | 490        | 157 |
| <i>metQ</i>  | ABC-type methionine transport system, periplasmic component                                                                                                                        | 133  | 588  | 491        | 192 |
| <i>metI</i>  | ABC-type methionine transport system, permease component                                                                                                                           | 134  | 587* | 492        | 191 |
| <i>artM</i>  | ABC-type amino acid transport system (probably arginine transporting), permease component I                                                                                        | 490  | 262  | 450        | /   |
| <i>artI</i>  | ABC-type amino acid transport system (probably arginine transporting), periplasmic component                                                                                       | 489  | 263  | 267*       | /   |
| <i>artP</i>  | ABC-type amino acid transport system (probably arginine transporting), ATPase component                                                                                            | 488  | 264  | 775        | /   |
| <i>artQ</i>  | ABC-type amino acid transport system (probably arginine transporting), permease component II                                                                                       | 487  | 265  | /          | /   |
| <i>artM2</i> | ABC-type amino acid transport system (probably arginine transporting), permease component I                                                                                        | 077  | /    | /          | /   |
| <i>artI2</i> | ABC-type amino acid transport system (probably arginine transporting), periplasmic component                                                                                       | 076* | /    | /          | /   |
| <i>artP2</i> | ABC-type amino acid transport system (probably arginine transporting), ATPase component                                                                                            | 079  | 634  | /          | /   |
|              | ABC-type amino acid transport system similar to ArtQ, permease and periplasmic component                                                                                           | 078  | 635  | /          | /   |

\* original annotation differs from this assignment

**Supplementary Table 29 (ST29). Identified subunits of probably incomplete ABC transporters.**

| <b>Gene</b>  | <b>Description</b>                                                                           | <b>OY-M</b><br>(PAM_) | <b>AYWB</b><br>(AYWB_) | <b>Paus</b><br>(PAa_0) | <b>Pmal</b><br>(ATP_00) |
|--------------|----------------------------------------------------------------------------------------------|-----------------------|------------------------|------------------------|-------------------------|
| <i>dppF2</i> | ABC-type dipeptide/oligopeptide transport system, ATPase component I                         | 026                   | /                      | 718                    | /                       |
| <i>dppD2</i> | ABC-type dipeptide/oligopeptide transport system, ATPase component II                        | 025                   | /                      | /                      | /                       |
| <i>dppB2</i> | ABC-type dipeptide/oligopeptide transport system, permease component I                       | 022                   | /                      | /                      | /                       |
| <i>dppC2</i> | ABC-type dipeptide/oligopeptide transport system, permease component II                      | 023 <sup>*1</sup>     | /                      | /                      | /                       |
| <i>oppA</i>  | ABC-type oligopeptide transport system, periplasmic component                                | /                     | /                      | /                      | 463                     |
| <i>cbiQ</i>  | ABC-type cobalt transport system, permease component                                         | 180                   | 539                    | 173                    | 371                     |
| <i>cbiO</i>  | ABC-type cobalt transport system, ATPase component                                           | 179 <sup>*1</sup>     | 540<br>541             | 174<br>175             | 370<br>369              |
| <i>cbiQ2</i> | ABC-type cobalt transport system, permease component                                         | <sup>*1</sup>         | 015                    | 139                    | /                       |
| <i>cbiO2</i> | ABC-type cobalt transport system, ATPase component                                           | 020                   | 014                    | 140                    | /                       |
| <i>artM</i>  | ABC-type amino acid transport system (probably arginine transporting), permease component    | 494                   | /                      | /                      | /                       |
| <i>artI</i>  | ABC-type amino acid transport system (probably arginine transporting), periplasmic component | 495                   | /                      | /                      | /                       |
|              | ABC-type amino acid transport system similar to ArtM, permease and periplasmic component     | 456                   | 315                    | /                      | /                       |
|              | ABC-type amino acid transport system, permease component                                     |                       | 314 <sup>*2</sup>      |                        |                         |
|              | ABC-type amino acid transport system similar to ArtI, permease and periplasmic component     | 457                   | /                      | /                      | /                       |
| <i>artM</i>  | ABC-type amino acid transport system (probably arginine transporting), permease component    | 639                   | /                      | /                      | /                       |
|              | ABC-type transport system, periplasmic component                                             | 640 <sup>*2</sup>     | /                      | /                      | /                       |
|              | ABC-type amino acid transport system, periplasmic component                                  | 641                   | /                      | /                      | /                       |
| <i>artM</i>  | ABC-type amino acid transport system (probably arginine transporting), permease component    | 464                   | /                      | /                      | /                       |
|              | ABC-type amino acid transport system similar to ArtM, permease and periplasmic component     | 588                   | 125                    | /                      | /                       |
|              | ABC-type amino acid transport system (periplasmic component), fragment-pseudo                | /                     | /                      | 013 <sup>*2</sup>      | /                       |
| <i>artM</i>  | ABC-type amino acid transport system                                                         | /                     | /                      | 014                    | /                       |

(permease component), fragment-pseudo

\*<sup>1</sup> indicates that the subunit was identified by additional analysis but is not part of the current submitted annotation in the databases.

\*<sup>2</sup> \* original annotation differs from this assignment

### Supplementary Table 30 (ST30). Putative thiamin transporter subunit.

| Gene | Description                                             | OY-M<br>(PAM_) | AYWB<br>(AYWB_) | Paus<br>(PAa_0) | Pmal<br>(ATP_00) |
|------|---------------------------------------------------------|----------------|-----------------|-----------------|------------------|
| -    | Putative thiamine transporter protein, Thia_YuaJ family | 176*           | 544*            | 178*            | 309*             |

\* original annotation differs from this assignment

### Supplementary Table 31 (ST31). Symporters.

| Gene        | Description                                | OY-M<br>(PAM_) | AYWB<br>(AYWB_) | Paus<br>(PAa_0) | Pmal<br>(ATP_00)  |
|-------------|--------------------------------------------|----------------|-----------------|-----------------|-------------------|
|             |                                            | 720            |                 |                 | 104               |
| <i>mleP</i> | Malate (citrate)/Na <sup>+</sup> symporter | 286            | 052<br>435      | 768             | 151<br>019<br>479 |

### Supplementary Table 32 (ST32). Multidrug efflux pump proteins.

| Gene        | Description                                             | OY-M<br>(PAM_) | AYWB<br>(AYWB_) | Paus<br>(PAa_0)   | Pmal<br>(ATP_00) |
|-------------|---------------------------------------------------------|----------------|-----------------|-------------------|------------------|
| <i>mdlB</i> | multidrug efflux pump, ATP-binding and permease protein | 059            | 028             | 114               | 111              |
| <i>mdlA</i> | multidrug efflux pump, ATP-binding and permease protein | *              | 029             | 115               | 110              |
|             |                                                         | 280            | 441             | 633               |                  |
| <i>norM</i> | Na <sup>+</sup> -driven multidrug efflux pump           | 282<br>734     | 439<br>651      | 165<br>110<br>171 | 107              |

\* indicates that the subunit was identified by additional analysis; original annotation differs from this assignment

**Supplementary Table 33 (ST33). P-type ATPases.**

| Gene        | Description                                        | OY-M<br>(PAM_) | AYWB<br>(AYWB_) | Paus<br>(PAa_0) | Pmal<br>(ATP_00) |
|-------------|----------------------------------------------------|----------------|-----------------|-----------------|------------------|
| <i>mgtA</i> | P-type ATPase exporting cations (probably Mg)      | 585            | 242             | 089             | 311              |
|             | P-type ATPase exporting cations (probably calcium) | 186            | 533             | 345             | 221              |
|             | P-type ATPase exporting cations                    | 030<br>252     | 018<br>469      | 779<br>673      | 222              |
|             | P-type ATPase exporting cations (probably cadmium) | 733            | 650             | 270             | 228              |

**Supplementary Table 34 (ST34). Large-conductance mechanosensitive channel proteins.**

| Gene        | Description                                | OY-M<br>(PAM_) | AYWB<br>(AYWB_) | Paus<br>(PAa_0) | Pmal<br>(ATP_00) |
|-------------|--------------------------------------------|----------------|-----------------|-----------------|------------------|
| <i>mscL</i> | large-conductance mechanosensitive channel | 058            | 027             | 113             | 331              |

**Supplementary Table 35 (ST35). Glycolysis and related genes.**

| Gene                          | Description                                                              | OY-M<br>(PAM_)    | AYWB<br>(AYWB_) | Paus<br>(PAa_0)   | Pmal<br>(ATP_00) |
|-------------------------------|--------------------------------------------------------------------------|-------------------|-----------------|-------------------|------------------|
| -                             | Had superfamily family phosphatase, subfamily IIIa                       | 301               | 421             | 505               | 245              |
| <i>Cof</i>                    | Had superfamily hydrolase, Subfamily IIb (sucrose-phosphate phosphatase) | 171<br>593<br>634 | 548<br>100      | 010<br>513<br>534 | 106              |
| <i>pgi</i>                    | glucose-6-phosphate isomerase                                            | 283               | 438             | 166               | 377              |
| <i>pfkA</i>                   | 6-phosphofructokinase                                                    | 281               | 440             | 164               | 105              |
| <i>fba</i>                    | Fructose-bisphosphate aldolase                                           | 172               | 547             | 512               | 109              |
| <i>tpiA</i>                   | triosephosphate isomerase                                                | 170               | 549             | 514               | 166              |
| <i>gapA</i>                   | glyceraldehyde-3-phosphate dehydrogenase                                 | 175               | 545             | 510               | -                |
| <i>pgk</i>                    | phosphoglycerate kinase                                                  | 174               | 546             | 511               | -                |
| <i>pgm</i><br>( <i>gpml</i> ) | Phosphoglyceromutase                                                     | 285               | 436             | 060               | -                |
| <i>eno</i>                    | phosphopyruvate hydratase                                                | 284               | 437             | 059               | -                |
| <i>pykF</i>                   | pyruvate kinase                                                          | 287               | 434             | 061               | -                |
| <i>dhaK</i>                   | kinase related to dihydroxyacetone kinase                                | 665               | 090             | 819               | 277              |
| <i>gtfA</i>                   | Sucrose phosphorylase (Glucosyltransferase-A)                            | 723               | -               | 221               | -                |

**Supplementary Table 36 (ST36). Deduced proteins involved in the formation of acetate from malate.**

| Gene                           | Description                                                                                         | OY-M<br>(PAM_) | AYWB<br>(AYWB_) | Paus<br>(PAa_0) | Pmal<br>(ATP_00)         |
|--------------------------------|-----------------------------------------------------------------------------------------------------|----------------|-----------------|-----------------|--------------------------|
| <i>mleP</i>                    | Malate (citrate)/Na <sup>+</sup> symporter                                                          | 720<br>286     | 052<br>435      | 768             | 104<br>151<br>019<br>479 |
| <i>sfcA</i><br>( <i>maeA</i> ) | NAD <sup>+</sup> -dependent malic enzyme                                                            | 721*           | 051             | 769             | 450*                     |
| <i>acoB</i><br>( <i>pdhB</i> ) | thiamine pyrophosphate-dependent dehydrogenase, E1 component beta subunit                           | 601            | 137             | 687             | 155                      |
| <i>acoA</i><br>( <i>pdhA</i> ) | thiamine pyrophosphate-dependent dehydrogenase, E1 component alpha subunit (pyruvate dehydrogenase) | 600            | 136             | 686             | 156                      |
| <i>aceF</i><br>( <i>pdhC</i> ) | branched-chain alpha-keto acid dehydrogenase subunit E2 (lipoate acetyltransferase)                 | 602            | 138             | 688             | 154                      |
| <i>Lpd</i><br>( <i>pdhD</i> )  | Dihydrolipoamide dehydrogenase                                                                      | 603            | 139             | 689             | 153                      |
| <i>coaE</i>                    | coenzyme A kinase*                                                                                  | 674            | 067             | 823             | 071                      |
| <i>hcaD</i>                    | NADH oxidase H <sub>2</sub> O <sub>2</sub> -forming                                                 | 441            | 324             | 837*            | 288                      |
| pduL-like                      | CoA-phosphotransacetylase, similar to propanediol utilisation protein PduL                          | 729*           | 646*            | 274*            | 224*                     |
| <i>ackA</i>                    | Acetate kinase                                                                                      | 159            | 560             | 121             | 319                      |
| <i>eda</i>                     | 2-dehydro-3-deoxyphosphogluconate aldolase/4-hydroxy-2-oxoglutarate aldolase                        | -              | -               | -               | 116                      |
| <i>acoB</i><br>( <i>pdhB</i> ) | thiamine pyrophosphate-dependent dehydrogenase, E1 component beta subunit                           | 601            | 137             | 687             | 155                      |
| <i>acoA</i><br>( <i>pdhA</i> ) | thiamine pyrophosphate-dependent dehydrogenase, E1 component alpha subunit (pyruvate dehydrogenase) | 600            | 136             | 686             | 156                      |
| <i>aceF</i><br>( <i>pdhC</i> ) | branched-chain alpha-keto acid dehydrogenase subunit E2 (lipoate acetyltransferase)                 | 602            | 138             | 688             | 154                      |
| <i>Lpd</i><br>( <i>pdhD</i> )  | Dihydrolipoamide dehydrogenase                                                                      | 603            | 139             | 689             | 153                      |
| <i>coaE</i>                    | coenzyme A kinase*                                                                                  | 674            | 067             | 823             | 071                      |
| <i>hcaD</i>                    | NADH oxidase H <sub>2</sub> O <sub>2</sub> -forming                                                 | 441            | 324             | 837*            | 288                      |
| pduL-like                      | CoA-phosphotransacetylase, similar to propanediol utilisation protein PduL                          | 729*           | 646*            | 274*            | 224*                     |
| <i>ackA</i>                    | Acetate kinase                                                                                      | 159            | 560             | 121             | 319                      |

\* original annotation differs from this assignment

**Supplementary Table 37 (ST37). NAD synthesis.**

| Gene                 | Description                                     | OY-M<br>(PAM_) | AYWB<br>(AYWB_) | Paus<br>(PAa_0) | Pmal<br>(ATP_00) |
|----------------------|-------------------------------------------------|----------------|-----------------|-----------------|------------------|
| <i>nadE/<br/>qns</i> | Glutamine-dependent NAD <sup>+</sup> synthetase | 124            | 598             | 763             | 183              |

**Supplementary Table 38 (ST38). Superoxide dismutase.**

| Gene        | Description          | OY-M<br>(PAM_) | AYWB<br>(AYWB_) | Paus<br>(PAa_0) | Pmal<br>(ATP_00) |
|-------------|----------------------|----------------|-----------------|-----------------|------------------|
| <i>sodA</i> | superoxide dismutase | 442            | 326             | 836             | 468<br>030       |

**Supplementary Table 39 (ST39). Lipoyl-protein ligases.**

| Gene        | Description              | OY-M<br>(PAM_) | AYWB<br>(AYWB_) | Paus<br>(PAa_0) | Pmal<br>(ATP_00) |
|-------------|--------------------------|----------------|-----------------|-----------------|------------------|
| <i>lplA</i> | lipoate-protein ligase A | 309            | 412             | 537             | 208              |

**Supplementary Table 40 (ST40). Nucleotide metabolism.**

| Gene        | Description                                              | OY-M<br>(PAM_) | AYWB<br>(AYWB_) | Paus<br>(PAa_0) | Pmal<br>(ATP_00) |
|-------------|----------------------------------------------------------|----------------|-----------------|-----------------|------------------|
| <i>adk</i>  | adenylate kinase                                         | 221            | 501             | 566             | 031<br>467       |
| <i>gmk</i>  | guanylate kinase                                         | 680<br>737     | 655             | 105             | 447              |
| <i>pnp</i>  | Polyribonucleotide nucleotidyltransferase                | 251            | 470             | 674             | 381              |
| <i>nrdA</i> | Ribonucleotide reductase, Coenzyme B12-dependent         | 054            | 025             | 056             | 187              |
| <i>nrdF</i> | Ribonucleotide/diphosphate reductase, subunit beta       | 055            | 026             | 112             | 186              |
| <i>spoT</i> | Guanosine-3',5'-bis(diphosphate) 3'-pyrophosphohydrolase | 126            | 596             | 767             | 181              |
| <i>udk</i>  | uridine kinase                                           | 142*           | 578             | -               | -                |
| <i>pyrH</i> | Uridylate kinase                                         | 167            | 552             | 517             | 234              |
| <i>pyrG</i> | CTP synthase                                             | 611            | 122             | 628             | 049              |
| <i>cmk</i>  | cytidylate kinase                                        | 239            | 482             | 781             | 122              |
| <i>thyA</i> | thymidylate synthase                                     | 293            | 430             | 084             | 320              |
| <i>tdk</i>  | thymidine kinase                                         | 104            | 605             | 713             | 140              |
|             |                                                          | 230            | 074             | 071             |                  |
|             |                                                          | 344            | 181             | 169             | 373              |
| <i>tmk</i>  | Thymidylate kinase                                       | 374            | 222             | 304             | 403              |
|             |                                                          | 521            | 282             | 324             |                  |
|             |                                                          |                | 492             | 365             |                  |

|            |                                                         |     |     |                                 |     |
|------------|---------------------------------------------------------|-----|-----|---------------------------------|-----|
|            |                                                         |     |     | 373                             |     |
|            |                                                         |     |     | 425                             |     |
|            |                                                         |     |     | 807                             |     |
|            |                                                         |     |     | 431                             |     |
|            |                                                         |     |     | 735                             |     |
|            |                                                         |     |     | 195                             |     |
|            |                                                         |     |     | 039                             |     |
|            |                                                         |     |     | 227                             |     |
| <i>dut</i> | DUTPase                                                 | 164 | 555 | 520                             | 231 |
| <i>hit</i> | diadenosine tetraphosphate hydrolase (AppppA hydrolase) | 630 | 104 | 705                             | 131 |
| -          | CMP/dCMP deaminase zinc-binding protein                 | 103 | 606 | 712                             | 139 |
|            | Putative IMP dehydrogenase/GMP reductase                | -   | -   | 048<br>068<br>203<br>381<br>417 | -   |

\* original annotation differs from this assignment

#### Supplementary Table 41 (ST41). Peptidases.

| Gene        | Description            | OY-M<br>(PAM_) | AYWB<br>(AYWB_) | Paus<br>(PAa_0) | Pmal<br>(ATP_00) |
|-------------|------------------------|----------------|-----------------|-----------------|------------------|
| <i>pepP</i> | Xaa-Pro aminopeptidase | 245            | -               | 679             | 042              |
| <i>pepV</i> | dipeptidase PepV       | 290            | 431             | -               | -                |
| <i>oepF</i> | oligoendopeptidase F   | 178            | 542             | 176             | -                |

#### Supplementary Table 42 (ST42). HflB and TldD proteins grouped by BLASTClust.

| Gene             | Description                                                                    | OY-M<br>(PAM_) | AYWB<br>(AYWB_) | Paus<br>(PAa_0) | Pmal<br>(ATP_00) |
|------------------|--------------------------------------------------------------------------------|----------------|-----------------|-----------------|------------------|
|                  |                                                                                | 064            |                 |                 |                  |
|                  |                                                                                | 117            |                 |                 |                  |
|                  |                                                                                | 130            |                 |                 |                  |
|                  |                                                                                | 307            | 071             |                 | 011              |
|                  |                                                                                | 316            | 096             |                 | 034              |
|                  |                                                                                | 326            | 183             | 136             | 039              |
|                  |                                                                                | 326            | 187             | 235             | 146              |
|                  |                                                                                | 356            | 213             | 488             | 273              |
| <i>hflB/ftsH</i> | ATP-dependent zinc metalloproteinase, transmembrane protein, HflB-like enzymes | 366            | 229             | 523             | 382              |
|                  |                                                                                | 393            | 275             | 539             | 406              |
|                  |                                                                                | 403            | 409             | 799             | 464              |
|                  |                                                                                | 480            | 414             |                 | 460              |
|                  |                                                                                | 532            | 591             |                 | 487              |
|                  |                                                                                | 561            |                 |                 |                  |
|                  |                                                                                | 658            |                 |                 |                  |
|                  |                                                                                | 664*           |                 |                 |                  |
|                  |                                                                                | 695            |                 |                 |                  |

|             |                       |      |      |     |     |
|-------------|-----------------------|------|------|-----|-----|
|             |                       | 713  |      |     |     |
|             |                       | 727  |      |     |     |
|             |                       | 762  |      |     |     |
| <i>tldD</i> | Zn-dependent protease | 447* | 331* | 703 | 323 |

\* original annotation differs from this assignment

### Supplementary Table 43 (ST43). Amino acid synthesis and modification.

| Gene        | Description                                                      | OY-M<br>(PAM_) | AYWB<br>(AYWB_) | Paus<br>(PAa_0) | Pmal<br>(ATP_00) |
|-------------|------------------------------------------------------------------|----------------|-----------------|-----------------|------------------|
| <i>metK</i> | S-Adenosylmethionine synthase;<br>methionine adenosyltransferase | -              | -               | -               | 296              |
| <i>asnB</i> | Asparagine synthase                                              | 594            | 130             | -               | -                |
| <i>smtA</i> | SAM-dependent methyltransferase                                  | 303            | 419             | 507             | -                |
| <i>argE</i> | acetylornithine deacetylase                                      | 292            | -               | -               | -                |

### Supplementary Table 44 (ST44). Genes involved in lipid synthesis.

| Gene        | Description                                                | OY-M<br>(PAM_) | AYWB<br>(AYWB_) | Paus<br>(PAa_0) | Pmal<br>(ATP_00) |
|-------------|------------------------------------------------------------|----------------|-----------------|-----------------|------------------|
| <i>cdsA</i> | Phosphatidate cytidyltransferase                           | 169            | 550             | 515             | 236              |
| <i>pgsA</i> | CDP-diacylglycerol-glycerol-3-<br>phosphatidyltransferase  | 718            | 053             | 816             | 134              |
| <i>pIsC</i> | Putative 1-acyl-sn-glycerol-3-phosphate<br>acyltransferase | 295            | 428             | 086             | 322              |
| <i>pIsX</i> | Fatty acid/phospholipid synthesis protein                  | 607            | 142             | 632             | 053              |
| <i>pIsY</i> | acyl phosphate:glycerol-3-phosphate<br>acyltransferase     | 436*           | 320*            | 266*            | 173*             |
| <i>psD</i>  | Phosphatidylserine decarboxylase<br>proenzyme              | 612            | 121             | 627             | 048              |
| <i>pssA</i> | CDP-diacylglycerol-serine O-<br>phosphatidyltransferase    | 613            | 120             | 626             | 047              |
| <i>gpsA</i> | glycerol 3-phosphate dehydrogenase                         | 241            | 480             | 684             | 120              |

\*The gene *pIsY* is annotated within the four genomes (and *A. laidlawii*, ACL\_0547) as hypothetical protein.

### Supplementary Table 45 (ST45). Genes involved in lipid synthesis.

| Gene        | Description                        | OY-M<br>(PAM_) | AYWB<br>(AYWB_) | Paus<br>(PAa_0) | Pmal<br>(ATP_00) |
|-------------|------------------------------------|----------------|-----------------|-----------------|------------------|
| <i>ribF</i> | Riboflavin kinase + FAD synthetase | 451            | -               | -               | -                |



**Supplementary Table 46 (ST46). Genes involved in lipid synthesis.**

| Gene        | Description                                                                           | OY-M<br>(PAM_) | AYWB<br>(AYWB_) | Paus<br>(PAa_0) | Pmal<br>(ATP_00) |
|-------------|---------------------------------------------------------------------------------------|----------------|-----------------|-----------------|------------------|
| <i>glyA</i> | serine hydroxymethyltransferase                                                       | 181            | 538             | 172             | 142              |
| <i>folk</i> | 7,8-Dihydro-6-hydroxymethylpterin-pyrophosphokinase                                   | 580            | 249*            | -               | -                |
| <i>folC</i> | Putative bifunctional protein: folylpolyglutamate synthase and dihydrofolate synthase | 007            | -               | -               | -                |
| <i>folA</i> | dihydrofolate reductase                                                               | 294            | 429             | 085             | 321              |
| <i>folP</i> | dihydropteroate synthase                                                              | 581            | 246*            | -               | -                |

\* original annotation differs from this assignment

**Supplementary Table 47 (ST47). Thiamine synthesis.**

| Gene        | Description                                                           | OY-M<br>(PAM_) | AYWB<br>(AYWB_) | Paus<br>(PAa_0) | Pmal<br>(ATP_00) |
|-------------|-----------------------------------------------------------------------|----------------|-----------------|-----------------|------------------|
| <i>thiJ</i> | 4-methyl-5(B-hydroxyethyl)-thiazole monophosphate biosynthesis enzyme | 137*           | 584             | 495*            | 237              |
| <i>thil</i> | thiamine biosynthesis protein                                         | 143*           | 577             | 601             | -                |

\* original annotation differs from this assignment

**Supplementary Table 48 (ST48). Pyridoxalphosphate.**

| Gene        | Description                              | OY-M<br>(PAM_) | AYWB<br>(AYWB_) | Paus<br>(PAa_0) | Pmal<br>(ATP_00) |
|-------------|------------------------------------------|----------------|-----------------|-----------------|------------------|
| <i>pdxK</i> | pyridoxal/pyridoxine/pyridoxamine kinase | 434            | -               | -               | -                |

**Supplementary Table 49 (ST49). Proteins involved in in iron-sulfur cluster biosynthesis.**

| Gene          | Description                                           | OY-M<br>(PAM_)    | AYWB<br>(AYWB_) | Paus<br>(PAa_0) | Pmal<br>(ATP_00) |
|---------------|-------------------------------------------------------|-------------------|-----------------|-----------------|------------------|
| <i>(iscU)</i> | nifU-like protein, involved in Fe-S cluster formation | 467<br>100<br>609 | 609             | 544<br>456      | 112              |
| <i>(csdB)</i> | nifS-like protein (selenocysteine lyase)              | 468               | 310             | 545             | 113              |

### Supplementary Table 50 (ST50). Acyl carrier protein metabolism.

| Gene        | Description                          | OY-M<br>(PAM_) | AYWB<br>(AYWB_) | Paus<br>(PAa_0) | Pmal<br>(ATP_00) |
|-------------|--------------------------------------|----------------|-----------------|-----------------|------------------|
| <i>acpP</i> | Acyl carrier protein                 | 739            | 657             | 099             | 445              |
| <i>acpS</i> | Holo-(acyl-carrier-protein) synthase | 440            | 323             | 838             | 294              |

### Supplementary Table 51 (ST51). Phosphorus metabolic processes.

| Gene        | Description                                  | OY-M<br>(PAM_) | AYWB<br>(AYWB_) | Paus<br>(PAa_0) | Pmal<br>(ATP_00) |
|-------------|----------------------------------------------|----------------|-----------------|-----------------|------------------|
| <i>ppa</i>  | inorganic pyrophosphatase                    | 145            | 575             | 602             | 329              |
| <i>fba</i>  | fructose/tagatose biphosphate aldolase       | 172            | 547             | 512             | 109              |
|             | exopolyphosphatase-related protein           | 746            | 664             | 019             | 163              |
|             | exopolyphosphatase-related protein           | 748            | 666             | 021             | -                |
| <i>hd</i>   | superfamily phosphohydrolase                 | 730            | 647             | 273             | 225              |
|             | phosphodiesterase                            | 272            | 448             | 640             | 127              |
|             | Putative metallophosphoesterase              | 273*           | 447*            | 639             | 126*             |
| <i>pgpB</i> | membrane-associated phospholipid phosphatase | 005            | -               | -               | 085              |
| <i>pldB</i> | Putative lysophospholipase                   | -              | -               | -               | 339              |
| <i>pldB</i> | Putative lysophospholipase                   | -              | -               | -               | 396              |

\* original annotation differs from the assignment

### Supplementary Table 52 (ST52). Miscellaneous.

| Gene        | Description                                                                      | OY-M<br>(PAM_) | AYWB<br>(AYWB_) | Paus<br>(PAa_0) | Pmal<br>(ATP_00) |
|-------------|----------------------------------------------------------------------------------|----------------|-----------------|-----------------|------------------|
| <i>frvX</i> | endo-1,4-beta-glucanase-like protein                                             | 740            | 658             | -               | -                |
| <i>trx</i>  | Thioredoxin                                                                      | 236            | 485             | 784             | 325              |
|             | tengu-su inducer                                                                 | 765            | 168             | -               | -                |
|             | Zn-dependent hydrolase                                                           | 637            | 098             | 006             | 210              |
| <i>YjeE</i> | P-loop hydrolase                                                                 | 500            | 253             | 215             | 198              |
|             | Uncharacterised protein, DegV family                                             | 583            | 244             | 091             | 095              |
|             | Uncharacterised protein, DegV family                                             | 636            | 099             | 007             | -                |
| <i>gcp</i>  | O-sialoglycoprotein endopeptidase                                                | 579            | 251             | 093             | 200              |
|             | Conserved hypothetical protein, similar to 3'-5' exoribonuclease YhaM            | 101            | 608             | 710             | 239              |
| <i>tpm</i>  | tetrapyrrole (Corrin/Porphyrin) methylase                                        | 232            | 490             | 167             | 375              |
|             | Conserved hypothetical protein                                                   | 584            | 243             | 090             | 312              |
|             | glycoprotease family protein                                                     | 501            | 252             | 216             | 199              |
|             | metalloprotein                                                                   | 624*           | 111             | 617             | 301*             |
|             | Nitroreductase                                                                   | 435            | 397             | 500             | 286              |
|             | Nitroreductase-like protein                                                      | -              | -               | -               | 287              |
| <i>arsC</i> | Putative arsenate reductase related protein,thioredoxin family [hypoth. protein] | 632            | -               | 012             | 202              |

\* original annotation differs from this assignment

**Supplementary figure 1. Simplified formation of SAM, L-asparagine and L-ornithine**

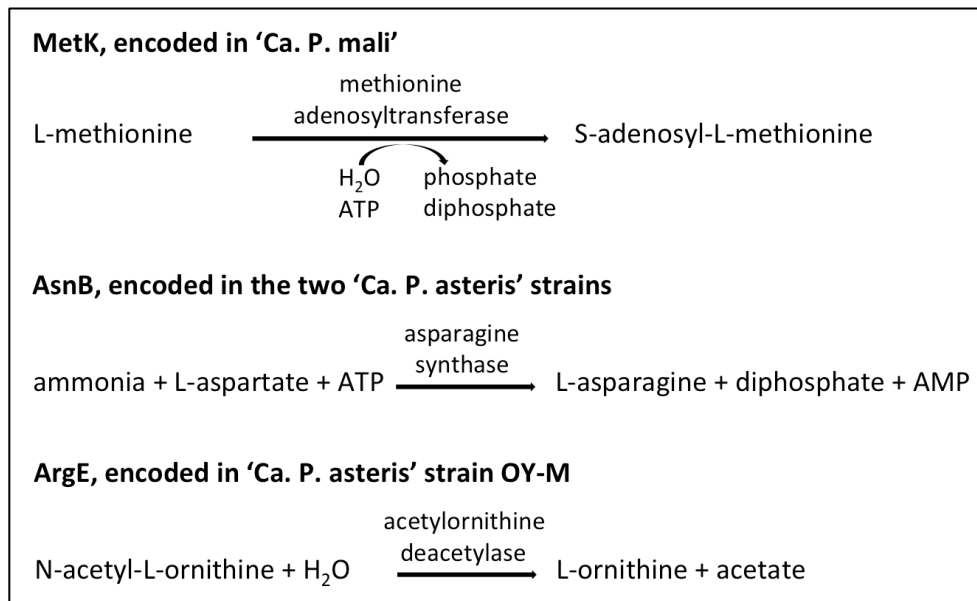

Supplement: f1 [file 185942.f1.pdf]
